# Supplementary material
Source: publisher site journal article supplement (https://www.degruyterbrill.com/publication/isbn/9783110973563/downloadAsset/9783110973563_Inhaltsverzeichnis.pdf)
Supplement: Supplementary file 1 [file 9783110973563_Inhaltsverzeichnis.pdf]

## Inhaltsübersicht

|                                               |       |
|-----------------------------------------------|-------|
| Verzeichnis späterer Normänderungen . . . . . | IX    |
| Abkürzungsverzeichnis . . . . .               | XLVII |

### MITBESTIMMUNGSGESETZ

|              |                                             |          |
|--------------|---------------------------------------------|----------|
| Erster Teil  | Geltungsbereich . . . . .                   | §§ 1–5   |
| Zweiter Teil | Aufsichtsrat . . . . .                      | §§ 6–29  |
| Dritter Teil | Gesetzliches Vertretungsorgan . . . . .     | §§ 30–33 |
| Vierter Teil | Seeschifffahrt . . . . .                    | § 34     |
| Fünfter Teil | Übergangs- und Schlußvorschriften . . . . . | §§ 35–41 |

### BETRIEBSVERFASSUNGSGESETZ 1952

#### Auszug

#### MONTAN-MITBESTIMMUNGSGESETZ

|              |                              |          |
|--------------|------------------------------|----------|
| Erster Teil  | Allgemeines . . . . .        | §§ 1–2   |
| Zweiter Teil | Aufsichtsrat . . . . .       | §§ 3–11  |
| Dritter Teil | Vorstand . . . . .           | §§ 12–13 |
| Vierter Teil | Schlußvorschriften . . . . . | §§ 14–15 |

#### MONTAN-MITBESTIMMUNGSERGÄNZUNGSGESETZ

|       |                                                                                                                  |          |
|-------|------------------------------------------------------------------------------------------------------------------|----------|
| Art 1 | Mitbestimmung in herrschenden Unternehmen . . . . .                                                              | §§ 1–17  |
| Art 2 | Anwendung und Änderung des Reichsgesetzes über die<br>Angelegenheiten der freiwilligen Gerichtsbarkeit . . . . . | § 18     |
| Art 3 | Übergangs- und Schlußvorschriften . . . . .                                                                      | §§ 21–23 |

# AKTIENGESETZ

## ERSTES BUCH

### AKTIENGESELLSCHAFT

#### Vierter Teil

#### Verfassung der Aktiengesellschaft

|                          |                                                                   |            |
|--------------------------|-------------------------------------------------------------------|------------|
| <i>Vierter Abschnitt</i> | Hauptversammlung                                                  |            |
| Erster Unterabschnitt    | Rechte der Hauptversammlung . . . . .                             | §§ 118–120 |
| Zweiter Unterabschnitt   | Einberufung der Hauptversammlung . . . . .                        | §§ 121–128 |
| Dritter Unterabschnitt   | Verhandlungsniederschrift. Auskunftsrecht . .                     | §§ 129–132 |
| Vierter Unterabschnitt   | Stimmrecht . . . . .                                              | §§ 133–137 |
| Fünfter Unterabschnitt   | Sonderbeschluß . . . . .                                          | § 138      |
| Sechster Unterabschnitt  | Vorzugsaktien ohne Stimmrecht . . . . .                           | §§ 139–141 |
| Siebenter Unterabschnitt | Sonderprüfung. Geltendmachung von Ersatz-<br>ansprüchen . . . . . | §§ 142–149 |

Sachregister
